# Supplementary material
Source: HighWire-hosted journal article supplement (doi:10.1101/rna.043414.113)

**Supporting Information File**

for

**Principles of ion recognition in RNA: insights from the group II intron structures**

Marco Marcia1, Anna Marie Pyle1,2*

**Tables**

**Table S1: site-bound ions in *O. iheyensis* group II intron.** The table lists the ion-binding sites indicating their binding motif, their domain localization, the ions that were identified at each site, and the maximum number of direct (innersphere) ion-RNA contacts. The values in parenthesis indicate the intensity (σ) of the corresponding anomalous scattering signal, the B-factor, and the occupancy of each heavy metal ion, respectively. “Phosphate-bound” indicates a metal bound to a single phosphate group of the RNA backbone, while “chelated” indicates an ion bound by at least to phosphates ([Draper 2004](#_ENREF_28)).

| **Site** | **Type** | **Location** | **Occupied by** | **Inner-sphere contacts1** |
| --- | --- | --- | --- | --- |
| **M1** | catalytic cluster | D5 | Mg2+, Ca2+, Ba2+ (5.80σ, 174.19, 0.65) | 2 (3 if 5’-exon present) |
| **M2** | catalytic cluster | D5 | Mg2+, Ca2+, Ba2+ (6.70σ, 166.73, 0.73) | 3 |
| **M3** | magnesium-clamp | D1d1-D1d2 | Mg2+, Ca2+, Ba2+ (6.70σ, 233.77, 0.60) | 2 |
| **M4** | phosphate-bound | D1-5'end | Mg2+ | 1 |
| **M5** | magnesium-clamp | D5 | Mg2+, Ca2+, Ba2+ (3.40σ, 201.29, 0.71) | 2 |
| **M6** | major groove ion | D3 | Mg2+, Ca2+, Ba2+ (3.70σ, 239.98, 0.78) | 1 |
| **M7** | major groove ion | D1B | Mg2+, Ca2+, Ba2+ (5.30σ, 169.49, 0.76) | 0 |
| **M8** | phosphate-bound | D1C | Mg2+, Ca2+, Ba2+ (3.70σ, 170.45, 0.57) | 1 |
| **M9** | phosphate-bound | D5 | Mg2+, Ca2+ | 1 |
| **M10** | major groove ion | D5 | Mg2+, Ca2+, Ba2+ (3.40σ, 201.29, 0.71) | 0 |
| **M11** | magnesium-clamp | D1C-D1d1 | Mg2+, Ca2+, Ba2+ (4.20σ, 274.67, 1.00) | 2 |
| **M12** | phosphate-bound | D1d2 | Mg2+, Ca2+ | 1 |
| **M13** | phosphate-bound | D1C | Mg2+, Ca2+ | 1 |
| **M14** | phosphate-bound | D1d1 | Mg2+, Ca2+ | 1 |
| **M15** | chelated | D1C | Mg2+, Ca2+ | 2 |
| **M16** | helix-bound | D1C-D2 | Mg2+, Ca2+ | 0 |
| **M17** | phosphate-bound | D1(i) | Mg2+ | 1 |
| **M18** | phosphate-bound | D1d2 | Mg2+, Ca2+ | 1 |
| **M19** | phosphate-bound | D1d2 | Mg2+, Ca2+ | 1 |
| **M20** | G-phosphate | D1C | Mg2+, Ca2+, Ba2+ (3.20σ, 173.75, 1.00) | 2 |
| **M21** | phosphate-bound | D1d1 | Mg2+, Ca2+, Ba2+ (3.90σ, 267.80, 1.00) | 2 |
| **M22** | phosphate-bound | D2 | Mg2+, Ca2+ | 1 |
| **M23** | major groove ion | D5 | Mg2+, Ca2+ | 0 |
| **M24** | phosphate-bound | D2 | Mg2+, Ca2+, Ba2+ (4.20σ, 156.08, 0.94) | 1 |
| **M25** | surface-bound | D1d1 | Mg2+, Ca2+, Ba2+ (3.50σ, 220.92, 1.00) | 0 |
| **M26** | phosphate-bound | D1C | Mg2+, Ca2+, Ba2+ (4.20σ, 274.67, 1.00) | 1 |
| **M27** | major groove ion | D1(loop) | Mg2+, Ba2+ (4.30σ, 237.66, 1.00) | 0 |
| **M28** | O2'-bound | D2 | Mg2+, Ba2+ (3.40σ, 173.67, 0.44) | 1 |
| **M29** | major groove ion | D1B | Ca2+, Ba2+ (4.00σ, 165.48, 0.68) | - |
| **M30** | helix-bound | D3 | Mg2+ | 0 |
| **M31** | phosphate-bound | D3 | Mg2+, Ba2+ (3.30σ, 188.50, 0.71) | 1 |
| **M32** | minor groove ion | D1C | Ba2+ (5.80σ, 128.08, 1.00) | - |
| **M33** | phosphate-bound | D1A | Mg2+, Ca2+, Ba2+ (3.90σ, 194.98, 0.78) | 1 |
| **M34** | phosphate-bound | D1d1 | Mg2+, Ba2+ (4.00σ, 167.45, 0.88) | 1 |
|  | | | | |
| **K1** | catalytic cluster | D2/3-D5 | K+, NH4+, Na+, Rb+ (11.70σ, 93.03, 1.00), Tl+ (34.80σ, 83.96, 1.00), Cs+ (15.40σ, 111.09, 1.00), Ba2+ (7.30σ, 19.05, 0.94) | 7 |
| **K2** | catalytic center | D1-5'end-D5 | K+, NH4+, Na+, Rb+ (5.50σ, 120.89, 0.73), Tl+ (4.50σ, 102.78, 0.20), Cs+ (7.90σ, 118.31, 0.42), Ba2+ (4.70σ, 167.95, 0.80) | 4 (5 after 5’-exon hydrolysis) |
| **K3** | catalytic (putative) | D5 | Rb+ (6.50σ, 54.01, 0.30), Tl+ (4.30σ, 109.08, 0.3), Cs+ (3.60σ, 108.13, 0.50) | - |
| **K4** | catalytic (distal) | D1C-D5 | K+, Rb+ (8.60σ, 88.69, 0.79), Tl+ (6.80σ, 82.46, 0.30), Cs+ (14.00σ, 90.99, 0.65) | 5 |
| **K5** | GU wobble | D1(ii) | K+, NH4+, Na+, Rb+ (5.60σ, 135.83, 1.00), Tl+ (4.70σ, 119.06, 0.41), Cs+ (9.40σ, 161.41, 1.00) | 4 |
| **K6** | imino GA mismatch | D2 | K+, Na+, Rb+ (3.3σ, 106.81, 0.66), Tl+ (5.80σ, 102.81, 0.28),  Cs+ (5.00σ, 119.52, 0.65), Ba2+ (4.70σ, 164.13, 1.00) | 6 |
| **K7** | tetraloop-receptor | D2 | K+, NH4+, Rb+ (5.10σ, 122.38, 0.69), Cs+ (5.90σ, 116.38, 0.52) | 3 |
| **K8** | tetraloop-receptor | D2 | K+, NH4+, Tl+ (8.20σ, 124.71, 0.40), Cs+ (3.60σ, 178.8, 0.72),  Ba2+ (6.90σ, 142.52, 1.00) | 3 |
| **K9** | major groove ion | D1A | K+, NH4+, Na+, Rb+ (4.00σ, 137.00, 0.89), Ba2+ (5.60σ, 129.48, 1.00) | 3 |
| **K10** | major groove ion (GC pair) | D1(i) | K+, NH4+, Na+, Cs+ (4.90σ, 137.61, 0.52), Ba2+ (3.40σ, 221.56, 0.92) | 2 |
| **K11** | GU wobble | D1C | K+, Rb+ (7.40σ, 73.46, 0.58), Tl+ (7.90σ, 60.59, 0.21), Cs+ (10.30σ, 83.06, 0.53), Ba2+ (3.60σ, 137.80, 1.00) | 5 |
| **K12** | T-loop | D1A | K+, Rb+ (7.00σ, 104.10, 0.57), Tl+ (8.00σ, 83.91, 0.30), Cs+ (10.30σ, 107.13, 0.57), Ba2+ (4.70σ, 176.98, 0.54) | 4 |
| **K13** | major groove ion (GC pair) | D4 | K+, NH4+, Na+, Rb+ (5.50σ, 126.90, 0.93), Cs+ (3.70σ, 165.69, 0.73), Ba2+ (4.70σ, 175.26, 0.77) | 1 |
| **K14** | tetraloop-receptor | D1C | K+, NH4+, Ba2+ (6.40σ, 126.03, 0.85) | 2 |
| **K15** | GU wobble | D1d2 | K+, NH4+, Na+, Cs+ (3.30σ, 132.94, 0.41), Ba2+ (4.90σ, 190.78, 0.78) | 3 |
| **K16** | tetraloop-receptor | D1C | Cs+ (7.80σ, 116.10, 0.55), Ba2+ (3.70σ, 150.21, 0.57) | - |
| **K17** | GU wobble | D1C | K+, NH4+, Rb+ (4.00σ, 135.28, 0.83), Cs+ (5.40σ, 145.30, 0.60),  Ba2+ (5.70σ, 204.74, 1.00) | 2 |
| **K18** | C2'-endo-pucker | D1B | Rb+ (5.60σ, 143.30, 1.00), Cs+ (9.90σ, 140.61, 0.87) | - |
| **K19** | S-turn | D3 | K+, Na+, Rb+ (4.10σ, 118.42, 0.61), Tl+ (15.20σ, 97.99, 0.47), Cs+ (4.10σ, 101.94, 0.36), Ba2+ (4.00σ, 140.83, 0.79) | 4 |
| **K20** | major groove ion (GC pair) | D4 | K+, Rb+ (4.10σ, 141.20, 0.75), Cs+ (7.60σ, 148.61, 0.81), Ba2+ (5.60σ, 212.42, 1.00) | 4 |
| **K21** | phosphate-bound | D1d2 | Tl+ (8.00σ, 82.37, 0.24), Ba2+ (5.30σ, 159.13, 0.99) | - |
| **K22** | GU wobble, catalytic (putative) | D5 | K+, Tl+ (11.30σ, 72.22, 0.31), Cs+ (6.20σ, 104.44, 0.44) | 1 |
| **K23** | GU wobble | D1d1 | K+, Tl+ (6.30σ, 142.86, 0.46), Cs+ (8.50σ, 123.52, 0.55) | 2 |
| **K24** | catalytic (putative) | D2/3-D5 | Cs+ (6.10σ, 155.35, 0.61) 2 | - |
| **K25** | phosphate-bound (putative) | D1(loop)-D1C | NH4+, Cs+ (6.30σ, 115.91, 0.45) | - |
| **K26** | major groove ion | D1B | K+, Cs+ (3.80σ, 191.13, 0.73), Ba2+ (4.70σ, 209.32, 0.83) | 2 |
| **K27** | minor groove ion | D1C-D2 | Cs+ (6.10σ, 132.92, 0.57) 2 | - |
| **K28** | minor groove ion (GC pair) | D4 | Cs+ (10.20σ, 106.56, 0.50) 2 | - |
| **K29** | catalytic (putative) | D5 | Tl+ (8.40σ, 89.97, 0.30) | - |
| **K30** | catalytic (putative) | D1d1-D5 | Cs+ (7.80σ, 129.51, 0.59) 2 | - |
| **K31** | major groove ion (GC pair) | D1(i) | K+, NH4+, Na+, Rb+ (3.80σ, 180.18, 0.98), Tl+ (6.10σ, 98.06, 0.29), Cs+ (4.70σ, 157.63, 0.65), Ba2+ (7.40σ, 126.03, 0.99) | 3 |
| **K32** | major groove ion (GC pair) | D1(i) | K+, NH4+, Rb+ (4.50σ, 133.56, 0.78), Tl+ (4.00σ, 147.56, 1.00),  Cs+ (3.70σ, 163.63, 0.50), Ba2+ (5.30σ, 189.35, 1.00) | 1 |
|  | | | | |
| **S1** | major groove ion | D1B | spermine, Cs+ (7.40σ, 198.67, 1.00), Ba2+ (4.40σ, 182.35, 0.97) | - |
| **S2** | T-loop | D1A | spermine, Cs+ (6.10σ, 136.08, 0.6), Ba2+ (4.70σ, 207.88, 0.91) | - |
|  | | | | |
| **A1** | consecutive GC pair | D1d1 | HEPES (3.10σ in Cs+ structure, 3.50σ in Ba2+ structure) | - |
| **A2** | consecutive GC pair | D1C | HEPES (3.10σ in Cs+ structure, 3.40σ in Ba2+ structure) | - |
| **A3** | GC pair | D1C | HEPES (3.30σ in Ba2+ structure) | - |
| **A4** | consecutive GC pair | D3 | HEPES (3.70σ in Cs+ structure, 3.50σ in Ba2+ structure) | - |
| **A5** | consecutive GC pair | D1C | HEPES (2.70σ in Cs+ structure, 3.10σ in Ba2+ structure) | - |
| **A6** | consecutive GC pair | D1C | HEPES (5.40σ in Ba2+ structure) | - |
|  | | | | |
| 1 The number of inner-sphere contacts is indicated only for sites occupied by physiological ions Mg2+ and K+. In all other instances it is indicated as “-“. The value “0” indicates that the ion contacts the RNA only via intermediate water molecules.  2 Cs+ sites may be of physiological relevance considering the analogy of Cs+ to cobalt hexammine, which in turns is analogous to hexahydrated magnesium ([Cowan 1993](#_ENREF_18); [Auffinger et al. 2011](#_ENREF_5)). | | | | |

**Figure S1: Divalent site-bound ions near the coordination loop.** The site-bound ions and the intron residues are colored as described in Figure 2 in the main text. The κ motif is indicated. Inner-sphere coordination and hydrogen bonds are shown as black dashed lines, with distances in angstroms, while putative outer-sphere coordination bonds are shown as gray dashed lines.


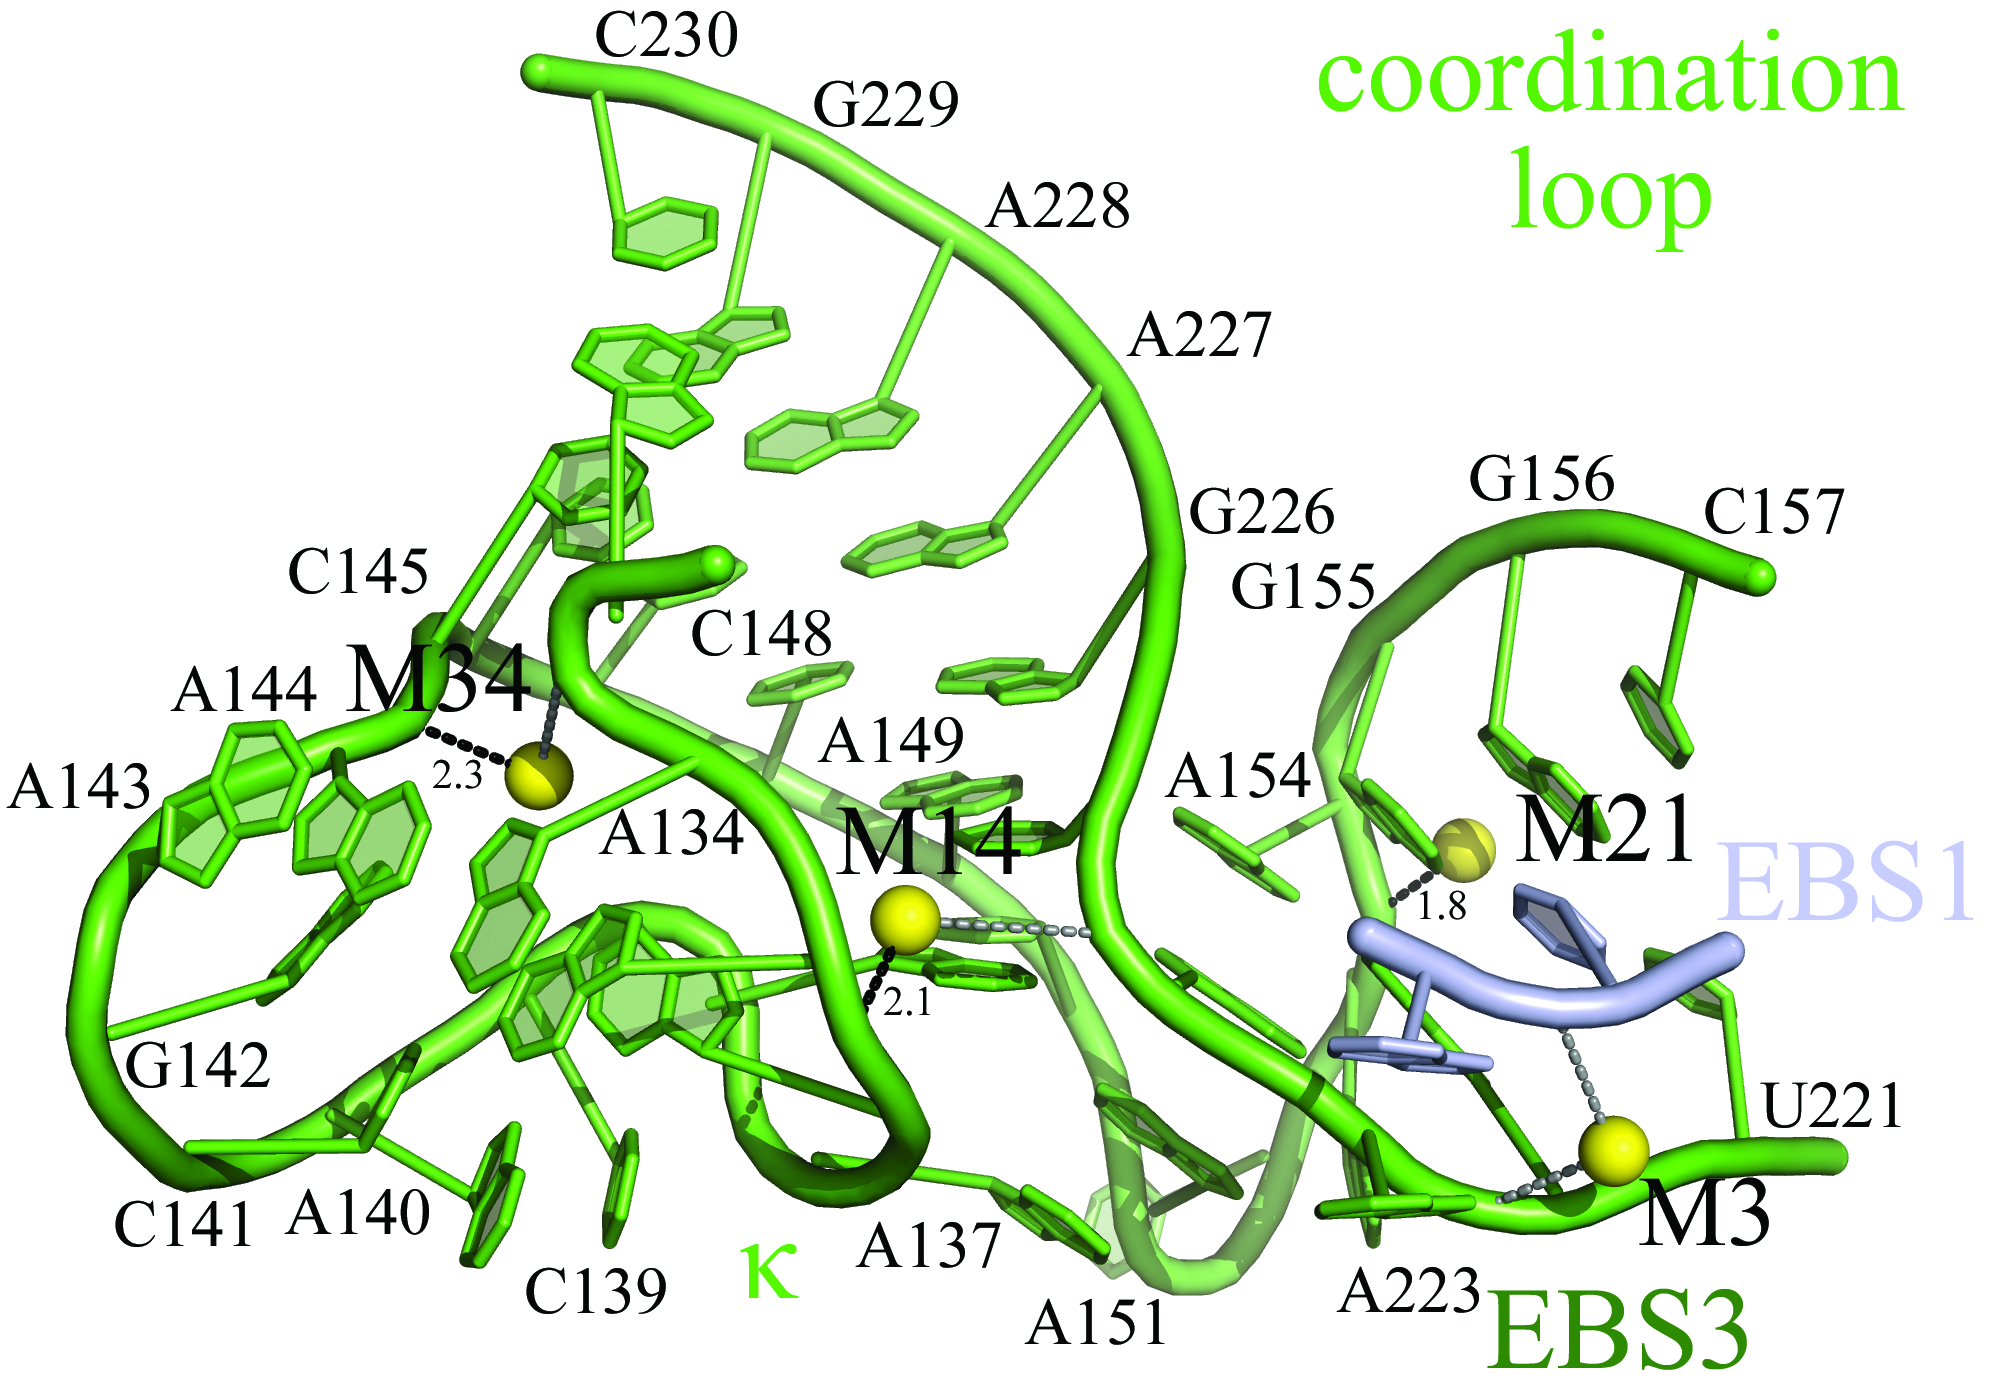


**Figure S2: K5 binds a GU wobble pair in D1(ii).** The K5 ion and the intron residues are colored as described in Figure 2 in the main text. Inner-sphere coordination and hydrogen bonds are shown as black dashed lines for K5 and for the G15U255 wobble pair. The corresponding distances are indicated in angstroms. Anomalous difference Fourier electron density map at the K5 site is shown as a green mesh at 3.5 σ for Tl+ (PDB id. 4E8Q). Right: electrostatic surface potential around K5. The color scale is indicated at the bottom in units of kT/e.


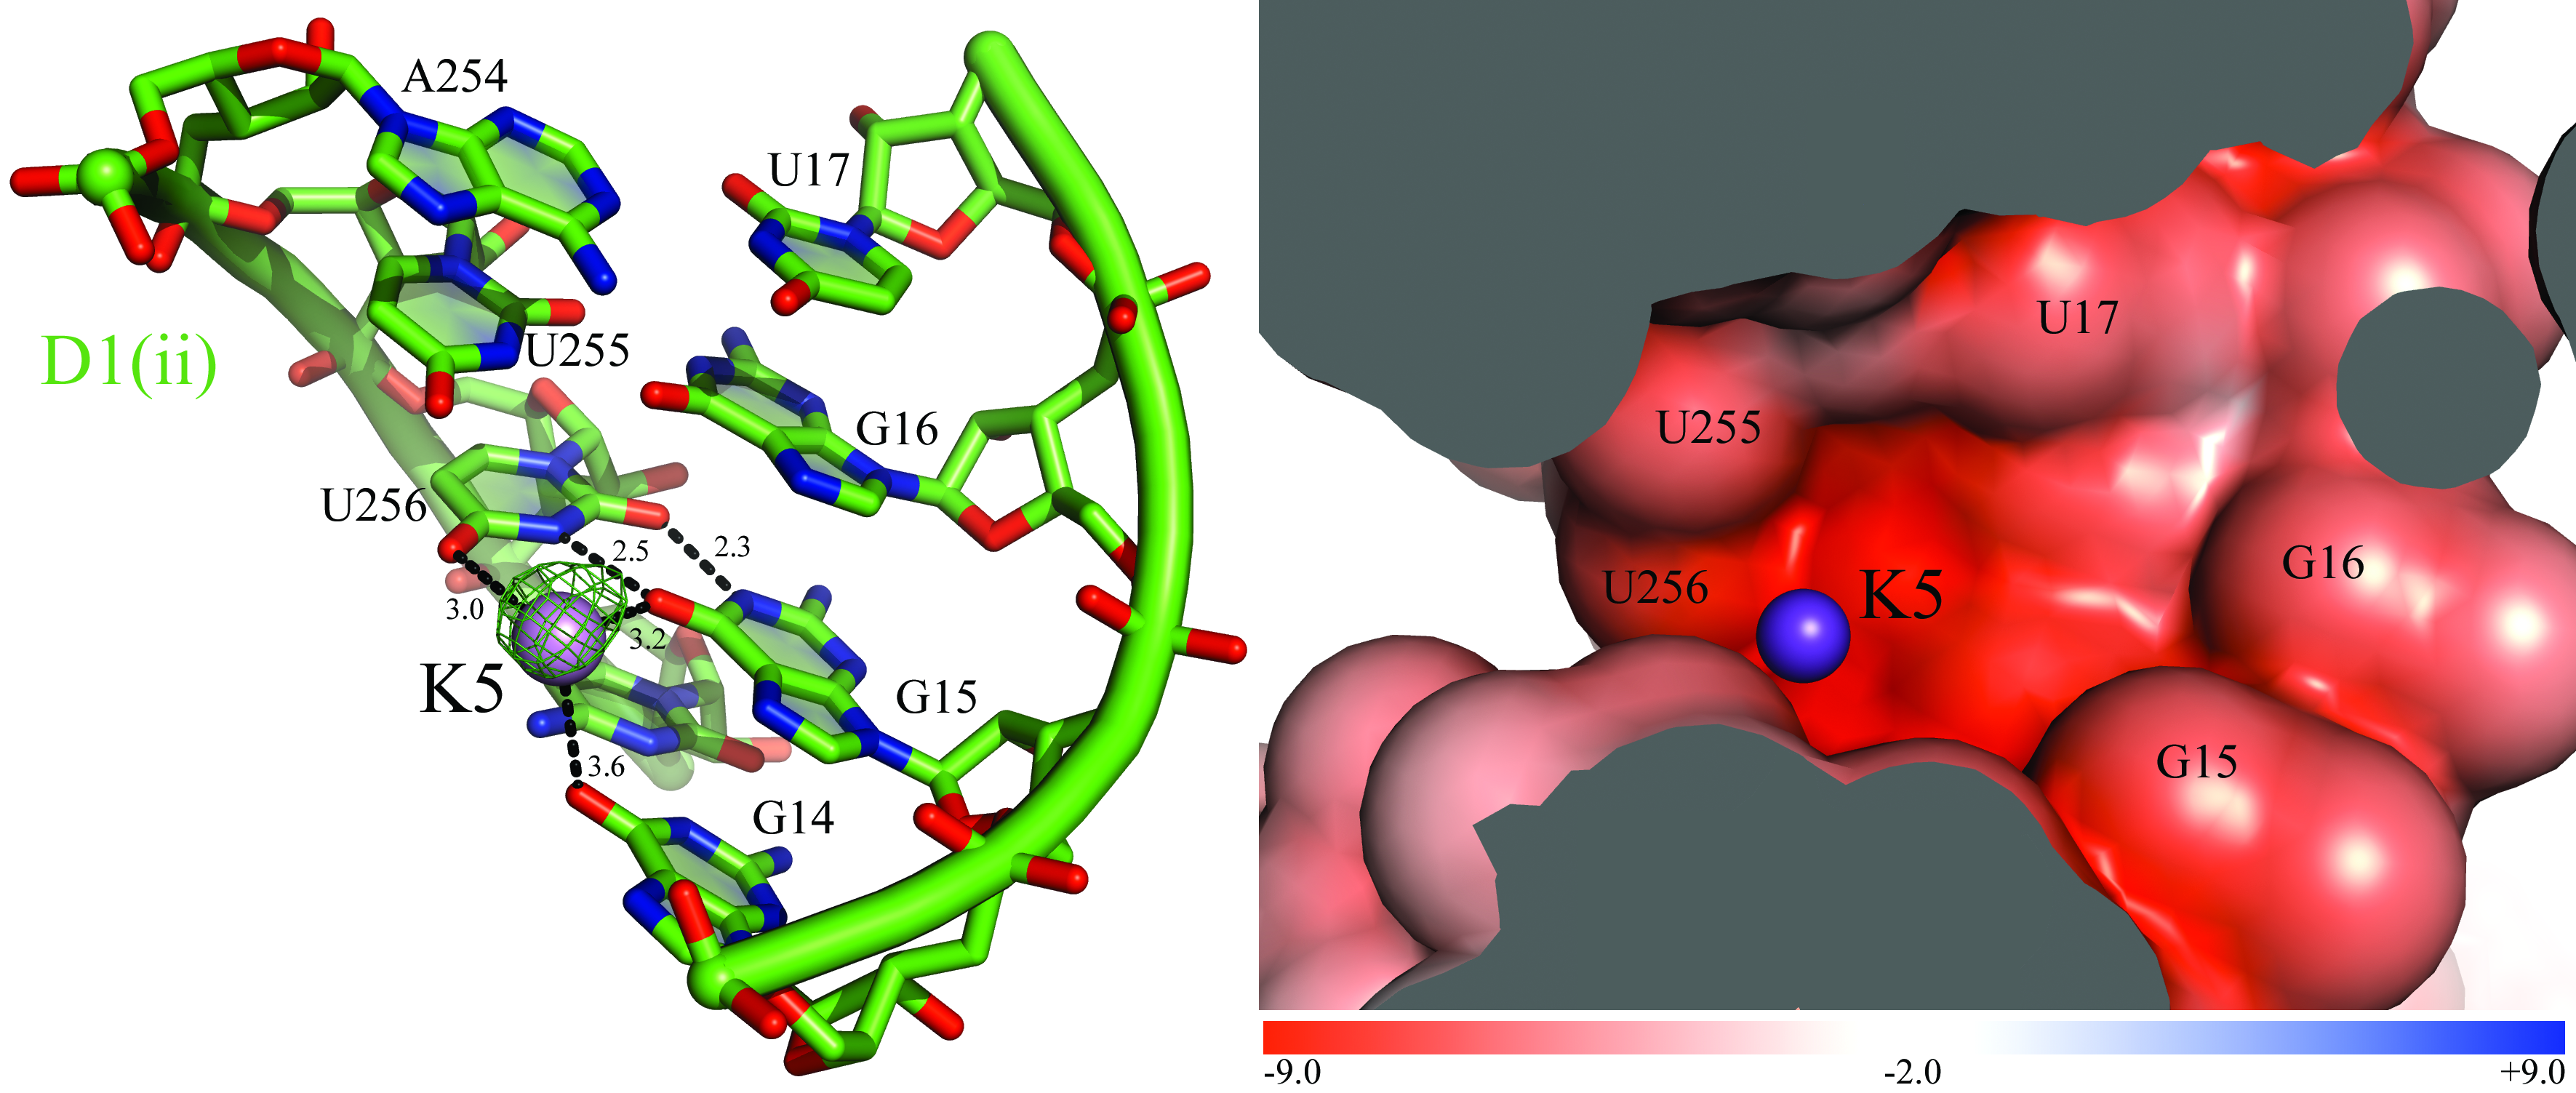


**Figure S3: Ionic network at the five-way junction.** The site-bound ions and the intron residues are colored as described in Figure 2 in the main text. Inner-sphere coordination bonds are shown as black dashed lines, with distances in angstroms, while outer-sphere coordination bonds are shown as gray lines.


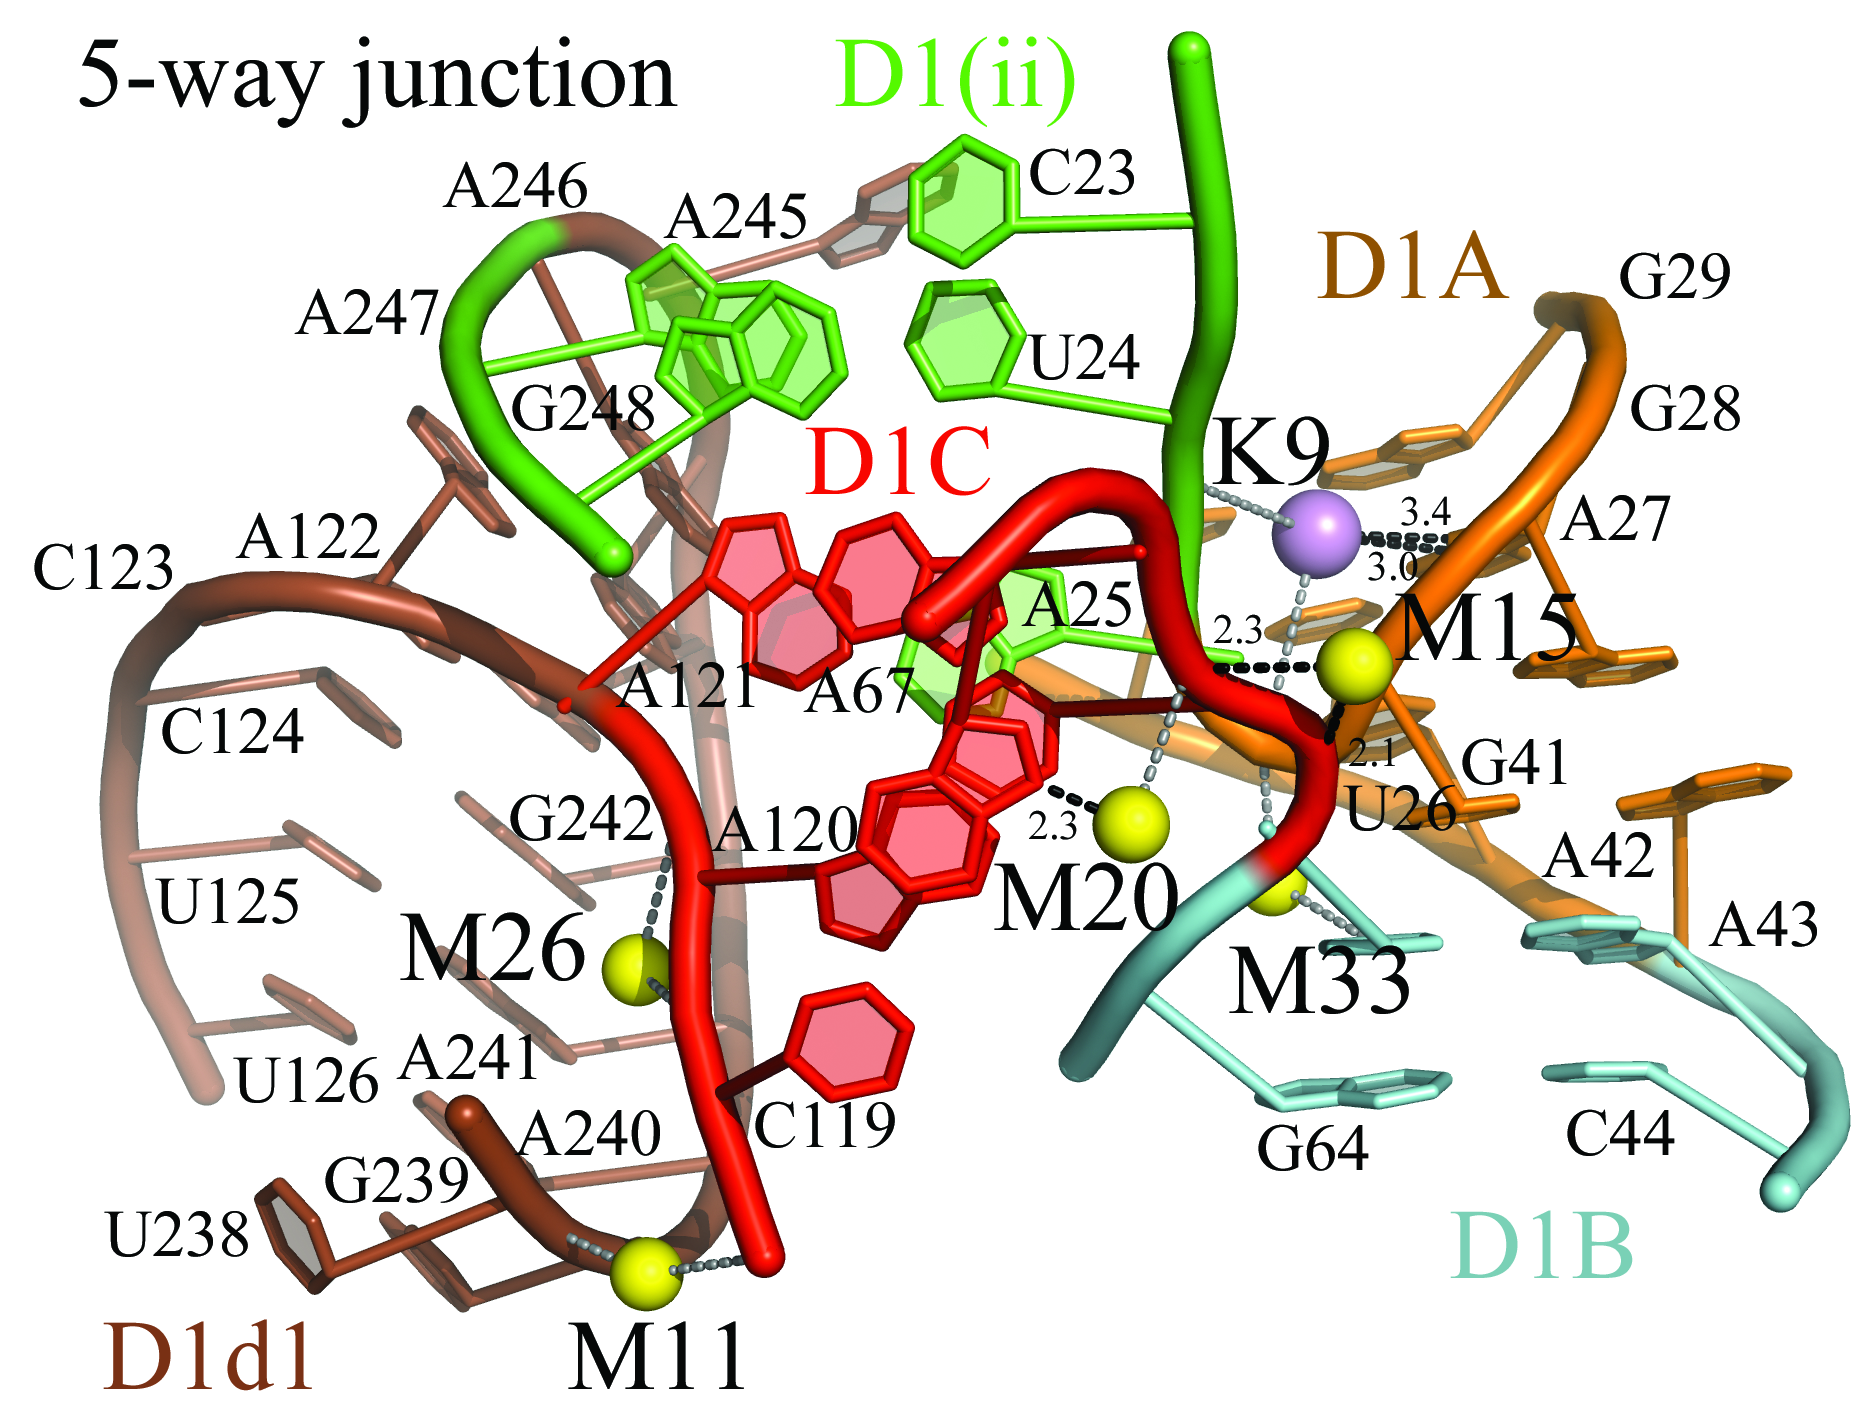


**Figure S4: Monovalent ionic network at the θ-θ’ interaction.** The site-bound ions and the intron residues are colored as described in Figure 2 in the main text. The θ-θ’ interaction is indicated. Inner-sphere coordination and hydrogen bonds are shown as black dashed lines, with distances in angstroms, while putative outer-sphere coordination bonds are shown as gray dashed lines. M32 is occupied only in the presence of Ba2+. Right: electrostatic surface potential at the θ-θ’ interaction. The color scale is indicated at the bottom in units of kT/e.


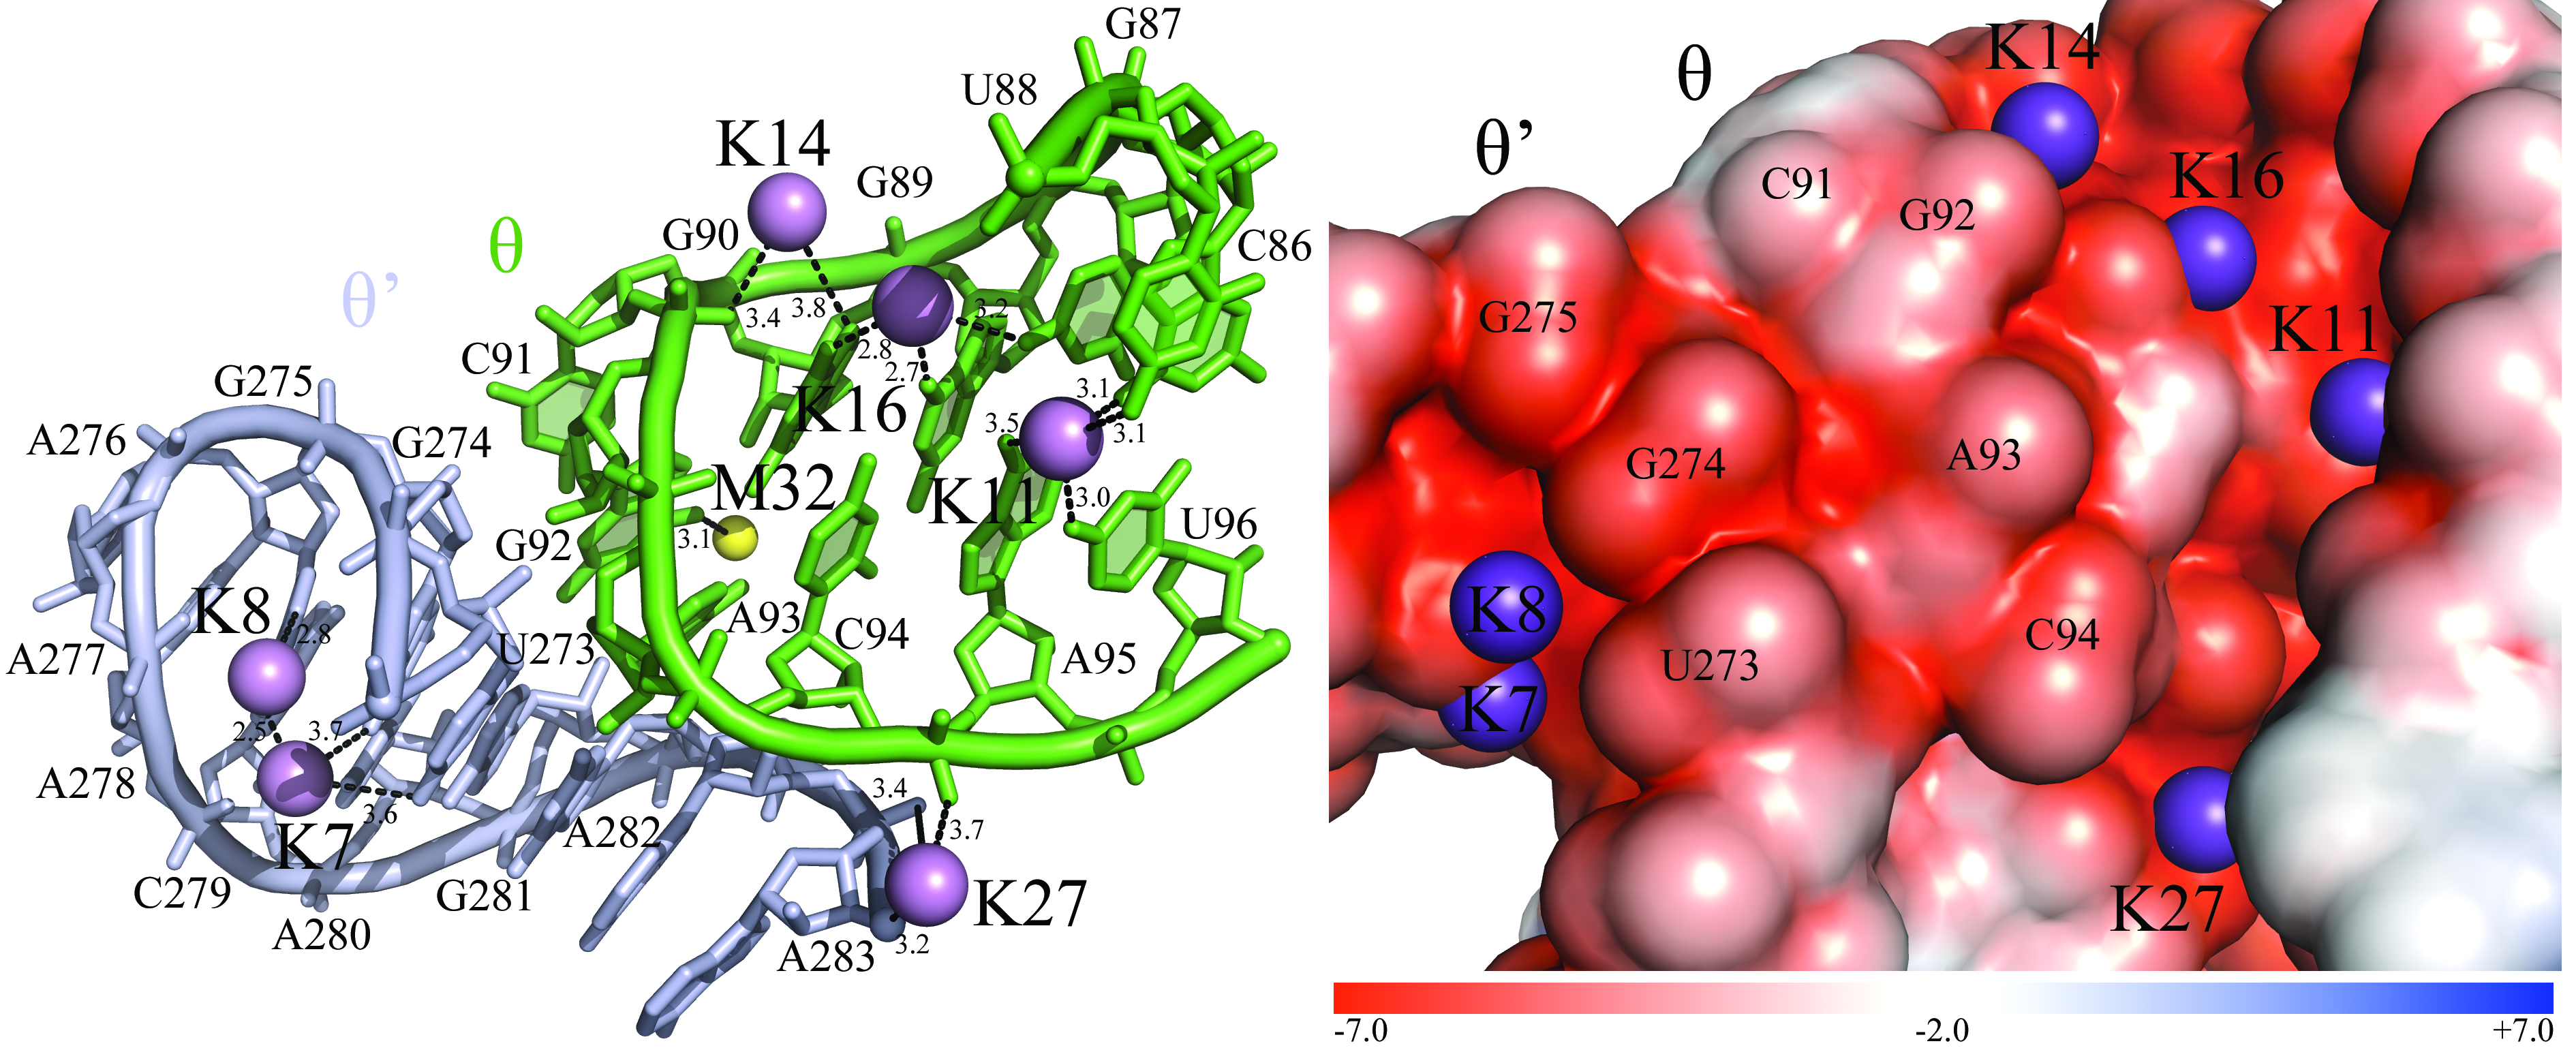


**Figure S5: Site-bound ions near the ω-ω’ interaction and EBS1.** The site-bound ions and the intron residues are colored as described in Figure 2 in the main text. The ω-ω’ interaction is indicated. Inner-sphere coordination and hydrogen bonds are shown as black dashed lines, with distances in angstroms. Right: electrostatic surface potential at the ω-ω’ interaction. The color scale is indicated at the bottom in units of kT/e.


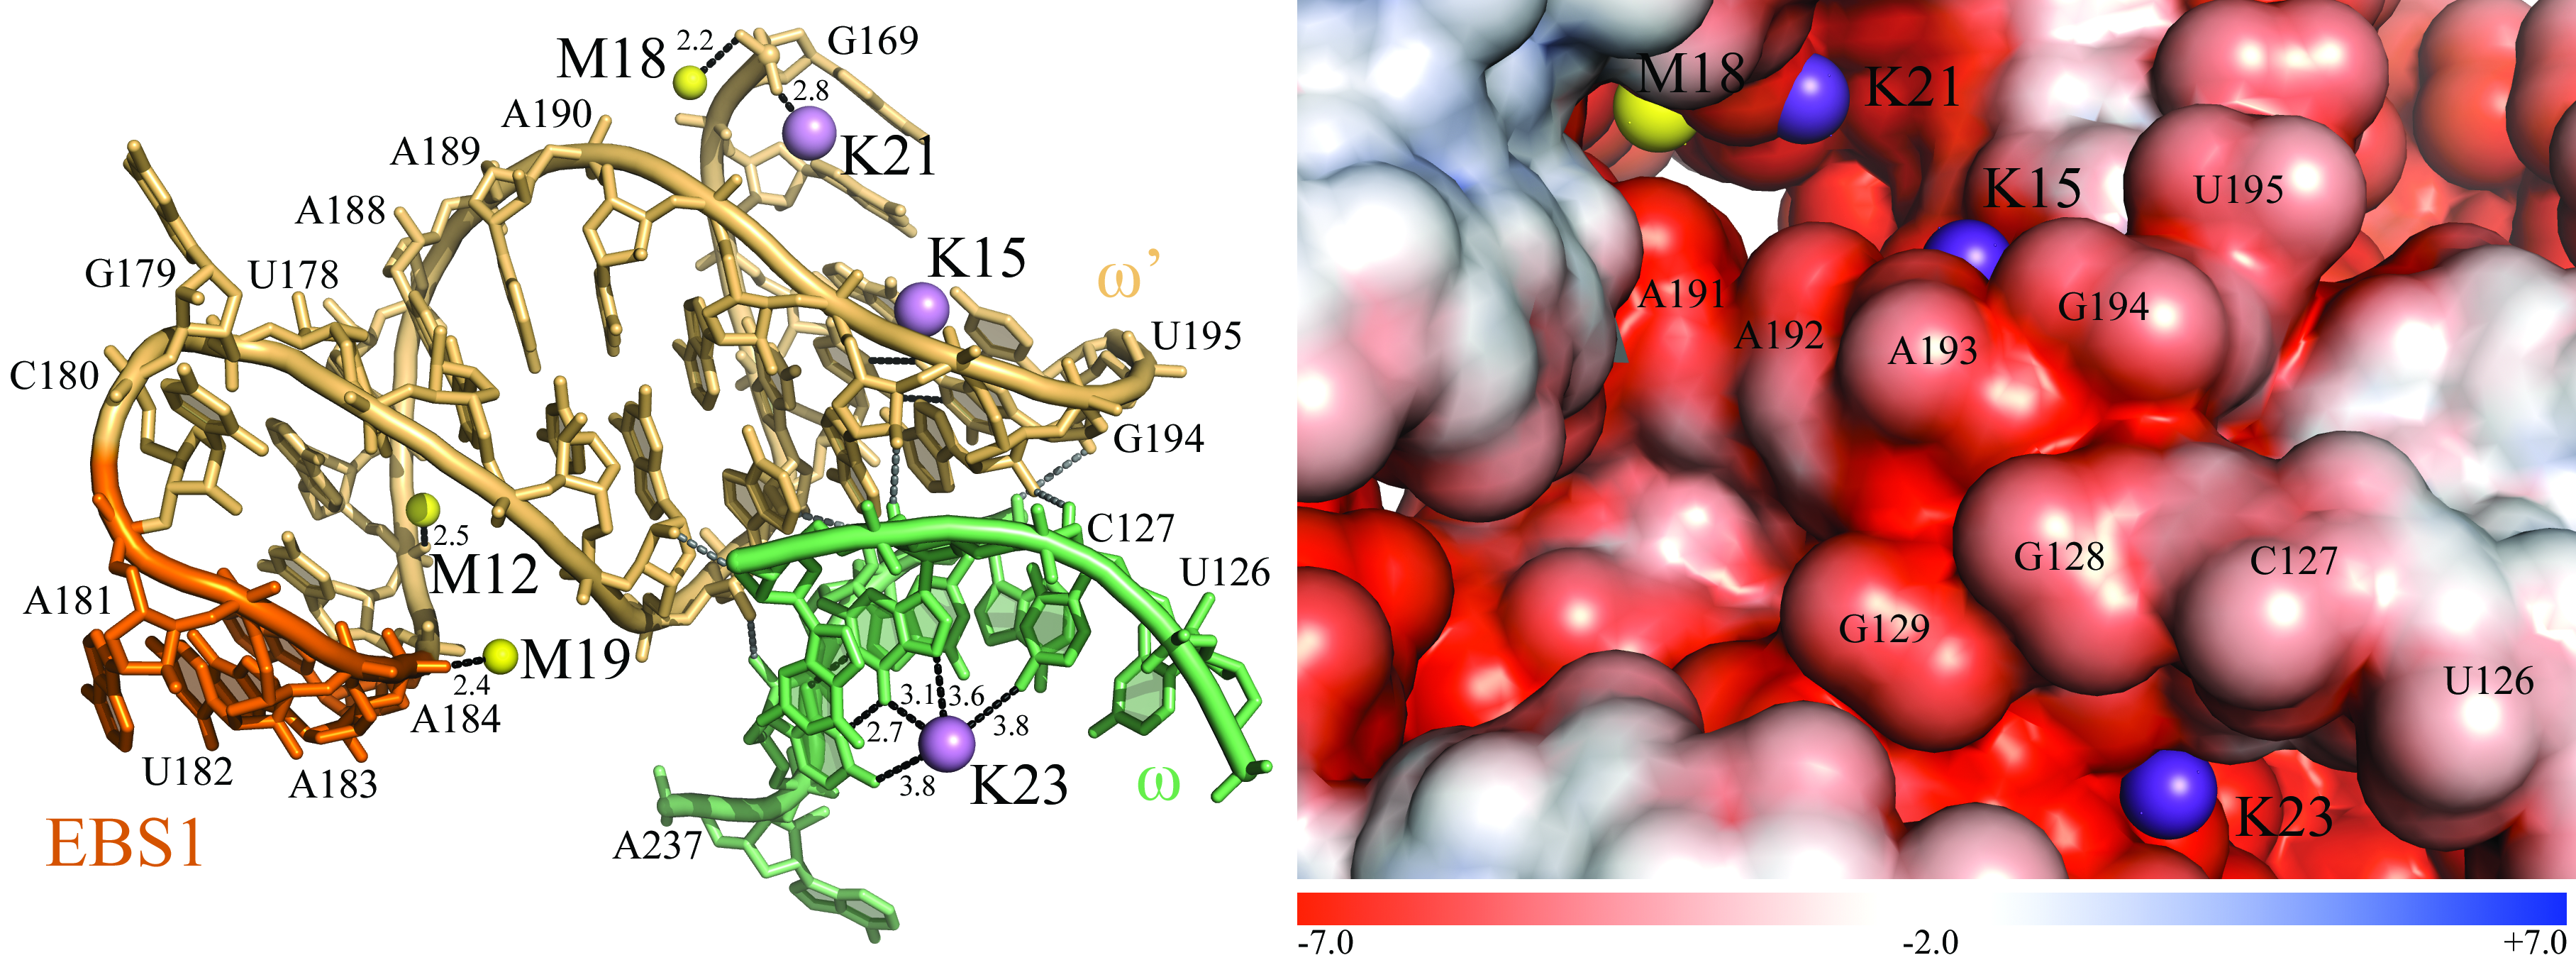


**Figure S6: Putative zwitterionic-binding sites A2-3 in D1C may correspond to protein interaction sites.** Electrostatic surface potential around A2 and A3. The color scale is indicated at the bottom in units of kT/e. HEPES molecules are drawn in a stick and ball representation, colored by atom type, C is yellow, N blue, O red, and S orange).


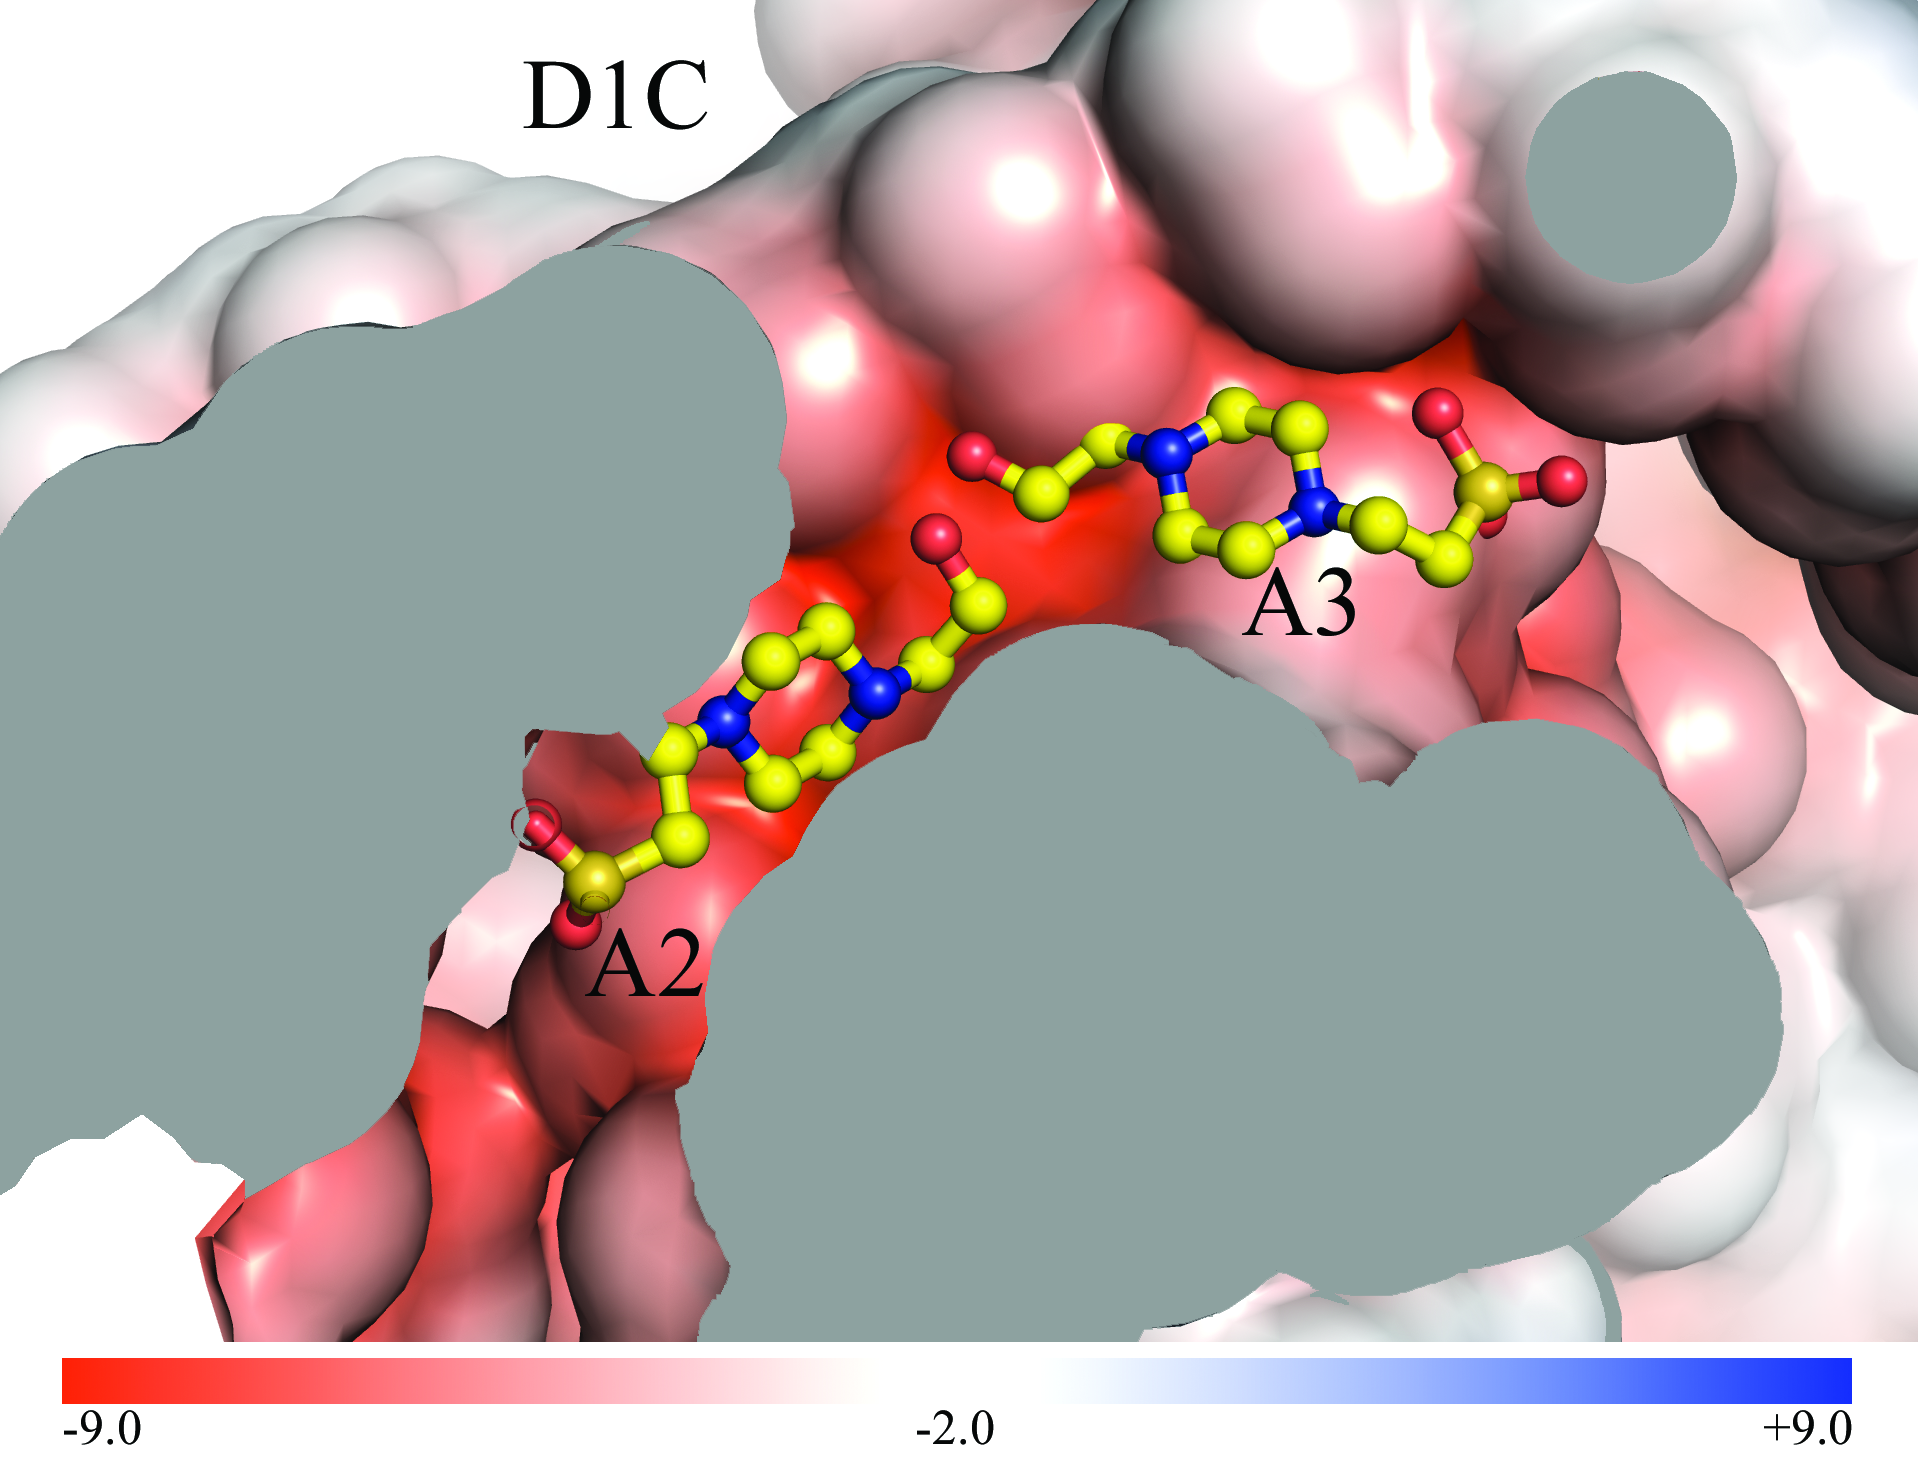

Supplement: SuppMaterial.docx [file SuppMaterial.docx]
